# Supplementary material for: Construction of a binary S-scheme S-g-C3N4/Co-ZF heterojunction with enhanced spatial charge separation for sunlight-driven photocatalytic performance
Source: Royal Society of Chemistry journal article supplement (doi:10.1039/d1ra08525e), 2022-01-01
Supplement: d1ra08525e1.pdf [file d1ra08525e1.pdf]

## Construction of a Binary S-scheme S-g-C<sub>3</sub>N<sub>4</sub>/Co-ZF Heterojunction with Enhanced Spatial Charge Separation for Sunlight-driven Photocatalytic Performance

Ali Bahadur<sup>1</sup>, Shahid Iqbal<sup>2\*</sup>, Mohsin Javed<sup>3</sup>, Syeda Saba Hassan<sup>3</sup>, Sohail Nadeem<sup>3</sup>, Ali Akbar<sup>4</sup>, Rami M. Alzhrani<sup>5</sup>, Murefah Mana Al-Anazy<sup>6</sup>, Eslam B. Elkaeed<sup>7</sup>, Nasser S. Awwad<sup>8</sup>, Hala A. Ibrahim<sup>9,10</sup>, Ayesha Mohyuddin<sup>3</sup>

<sup>1</sup>Department of Chemistry, College of Science and Technology Wenzhou-Kean University, Wenzhou, China.

<sup>2</sup>Department of Chemistry, School of Natural Sciences (SNS), National University of Science and Technology (NUST), H-12, Islamabad, 46000, Pakistan.

<sup>3</sup>Department of Chemistry, School of Science, University of Management and Technology, Lahore, Pakistan.

<sup>4</sup>Department of Physics, University of Agriculture Faisalabad (UAF), Faisalabad Punjab, 38000, Pakistan.

<sup>5</sup>Department of Pharmaceutics and Industrial Pharmacy, College of Pharmacy, Taif University, P.O. Box 11099, Taif 21944, Saudi Arabia.

<sup>6</sup>Department of Chemistry, College of Science, Princess Nourah bint Abdulrahman University, P.O. Box 84428, Riyadh 11671, Saudi Arabia.

<sup>7</sup>Department of Pharmaceutical Sciences, College of Pharmacy, AlMaarefa University, Riyadh 13713, Saudi Arabia.

<sup>8</sup>Chemistry Department, Faculty of Science, King Khalid University, P.O. Box 9004, Abha 61413, Saudi Arabia.

<sup>9</sup>Biology Department, Faculty of Science, King Khalid University, P.O. Box 9004, Abha 61413, Saudi Arabia.

<sup>10</sup>Department of Semi Pilot Plant, Nuclear Materials Authority, P.O. Box 530, El Maadi, Egypt.

**\*To whom corresponding should be addressed**

[shahidiqbal.chem@sns.nust.edu.pk](mailto:shahidiqbal.chem@sns.nust.edu.pk) (Shahid Iqbal)

### Materials characterization

Using Cu K radiations (1.5406 Å), 40 mA of applied current in increments of 0.040, and an accelerating voltage of 40 KV, the crystalline structure of the samples was seen on a D8 Burker powder X-ray diffractometer, which ranged from 20 to 80°. Using a transmission electron microscope, the surface morphologies of the photocatalysts were examined (TEM, JEOL-JEM-1230). The 5,5-dimethyl-1-pyrroline-N-oxide (DMPO) solvent was used to perform the ESR signals on a JES FA200 spectrometer from JEOL Co. Alpha Bruker-Rays Fourier transform infrared spectrophotometer, operating in the 4000-400 cm<sup>-1</sup> range, was used to perform the functional group analysis of the materials. A UV-visible spectrophotometer (Shimadzu, UV-1700) with a wavelength of 200-800 nm was used to evaluate the effectiveness of sample

degradation. On a multifunctional Kratos Axis-Ultra X-ray spectrometer, XPS evaluations were carried out. All BEs were consistent with respect to the charge effect's charge effect shift at the C1s peak (284.8 eV) of the surface adventitious C. Through N<sub>2</sub> adsorption in an electronic gas-sorption apparatus, the BET surface area was examined (using a Micromeritics ASAP 2020 equipment). Pt wire served as the counter electrode, photocatalyst-coated FTO served as the working electrode, and Ag/AgCl served as the reference electrode in transient photocurrent response experiments using a conventional three-electrode setup (CHI 602 Electrochemical Workstation) at 25 °C. A 20 mV signal amplitude was used to measure the EIS at -0.6 V (vs. Ag/AgCl) from 10<sup>5</sup> to 0.1 Hz.

### Photocatalytic activity measurements

To evaluate the photocatalytic effectiveness of produced NPs and NCs, the MB was employed as the reference pollutant. A concentration of 0.012 gL<sup>-1</sup> of photocatalyst (0.1 g) was disseminated in 100 ml of MB aqueous solution in order to carry out the photocatalytic reactions. After that, the suspension was stirred magnetically in the dark for 30 minutes to achieve adsorption-desorption equilibrium. After that, it was in direct sunshine for 60 minutes. The UV-visible spectrophotometer used to evaluate the 5 mL aliquots was used to record changes in the absorption band (664 nm) of the MB's UV-visible spectra.

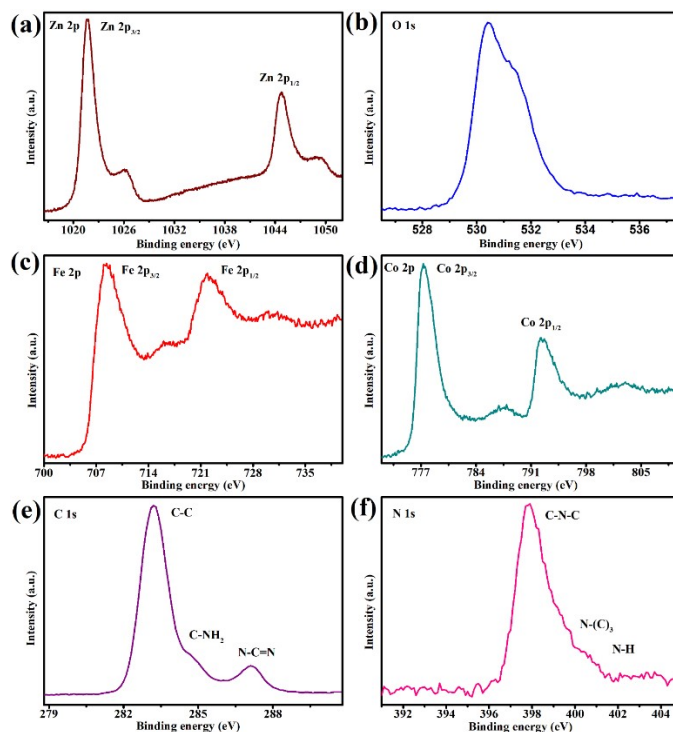

**Figure S1.** High-resolution XPS spectra of 48 % NC of S-g-C<sub>3</sub>N<sub>4</sub>/6 % Co-ZF; (a) Zn 2p, (b) O 1s, (c) Fe 2p, (d) Co 2p, (e) C 1s and (f) N 1s.

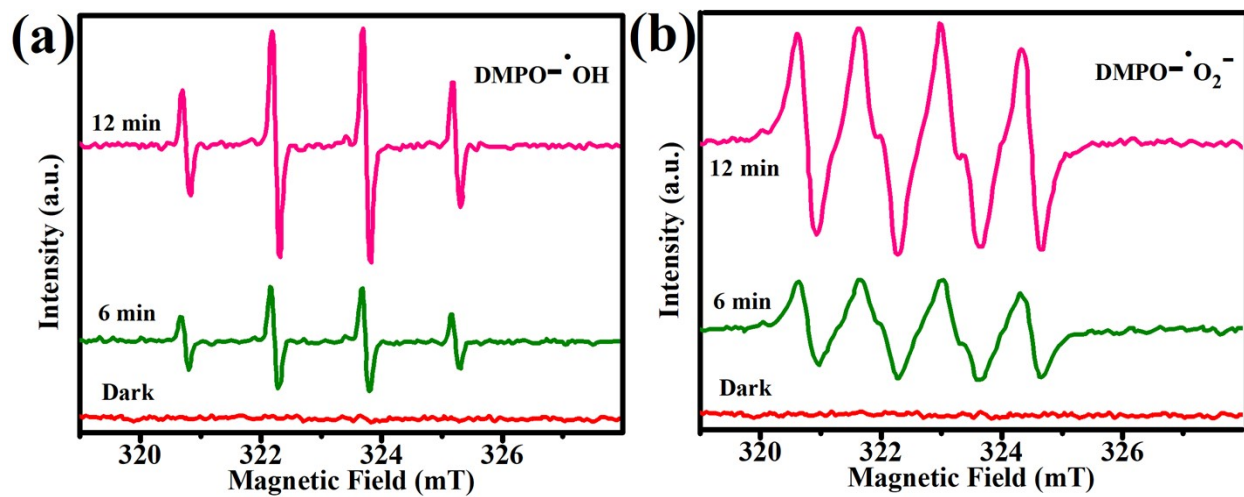

**Figure S2.** ESR spectra of 48 % NC of S-g-C<sub>3</sub>N<sub>4</sub>/6 % Co-ZF NCs: (c) in aqueous suspension for DMPO•OH and (d) in methanol suspension for DMPO•O<sub>2</sub><sup>-</sup> under visible light radiance.
